# Supplementary material for: State influence in the resettlement of Southeast Asian refugees in the state of Hawaii
Source: MDPI journal article supplement (doi:10.3390/nu15214515), 1991-01-01
Supplement: s1 [file s1]

**Table S5.** Comparison of dietary change frequencies per each of six subpar information sources relative to the number of books owned.

| Source Reliance for Making Dietary Changes  |              | Number of Physical and Digital Books Owned |       |         |         |              | Total Responses <i>n</i> |
|---------------------------------------------|--------------|--------------------------------------------|-------|---------|---------|--------------|--------------------------|
|                                             |              | 0-9                                        | 10-99 | 100-499 | 500-999 | 1000 or more |                          |
|                                             |              | %                                          |       |         |         |              |                          |
| Social media                                | Never        | 6.4                                        | 32.4  | 40.3    | 13.4    | 7.6          | 1243                     |
|                                             | Rarely       | 9.2                                        | 37.6  | 36.8    | 10.3    | 6.1          | 620                      |
|                                             | Sometimes    | 10.3                                       | 47.9  | 30.8    | 7.7     | 3.3          | 428                      |
|                                             | Often        | 26.4                                       | 34.1  | 33.0    | 5.5     | 1.1          | 91                       |
|                                             | All the time | 20.7                                       | 58.6  | 13.8    | 0.0     | 6.9          | 29                       |
| Influencers followed on social media        | Never        | 7.0                                        | 32.3  | 40.1    | 13.2    | 7.5          | 1288                     |
|                                             | Rarely       | 8.3                                        | 40.3  | 36.2    | 8.9     | 6.4          | 531                      |
|                                             | Sometimes    | 12.8                                       | 41.9  | 32.8    | 8.7     | 3.9          | 461                      |
|                                             | Often        | 15.8                                       | 48.3  | 28.1    | 7.0     | 0.9          | 114                      |
|                                             | All the time | 15.6                                       | 53.1  | 21.9    | 6.3     | 3.1          | 32                       |
| Famous personalities, actors, or presenters | Never        | 7.6                                        | 34.9  | 38.4    | 12.3    | 6.7          | 1707                     |
|                                             | Rarely       | 8.9                                        | 40.8  | 35.9    | 9.1     | 5.4          | 449                      |
|                                             | Sometimes    | 13.5                                       | 41.1  | 33.8    | 7.3     | 4.4          | 207                      |
|                                             | Often        | 26.8                                       | 51.2  | 14.6    | 4.9     | 2.4          | 41                       |
|                                             | All the time | 35.0                                       | 45.0  | 20.0    | 0.0     | 0.0          | 20                       |
| Diet or health books                        | Never        | 15.0                                       | 38.1  | 33.5    | 9.2     | 4.2          | 260                      |
|                                             | Rarely       | 10.4                                       | 37.0  | 33.7    | 12.3    | 6.6          | 422                      |
|                                             | Sometimes    | 7.0                                        | 34.4  | 39.4    | 12.2    | 7.1          | 1120                     |
|                                             | Often        | 7.4                                        | 40.2  | 38.2    | 9.7     | 4.4          | 497                      |
|                                             | All the time | 11.4                                       | 48.3  | 27.2    | 6.1     | 7.0          | 114                      |
| Nutrition or health websites                | Never        | 13.4                                       | 35.0  | 32.3    | 12.4    | 7.0          | 186                      |
|                                             | Rarely       | 9.0                                        | 33.3  | 37.3    | 13.3    | 7.1          | 421                      |
|                                             | Sometimes    | 6.7                                        | 36.1  | 40.1    | 10.8    | 6.3          | 1199                     |
|                                             | Often        | 10.6                                       | 40.3  | 33.1    | 11.3    | 4.7          | 489                      |
|                                             | All the time | 15.9                                       | 49.2  | 25.4    | 4.0     | 5.6          | 126                      |
| Google or Internet searches                 | Never        | 7.4                                        | 32.6  | 41.7    | 12.0    | 6.3          | 460                      |
|                                             | Rarely       | 7.5                                        | 34.8  | 34.8    | 14.1    | 8.9          | 655                      |
|                                             | Sometimes    | 7.5                                        | 39.4  | 38.0    | 9.8     | 5.3          | 947                      |
|                                             | Often        | 14.1                                       | 39.1  | 34.4    | 8.7     | 3.6          | 276                      |
|                                             | All the time | 25.0                                       | 47.4  | 18.4    | 5.3     | 4.0          | 76                       |

\* Bolded values represent  $p < 0.05$ .
