# Supplementary material for: State influence in the resettlement of Southeast Asian refugees in the state of Hawaii
Source: MDPI journal article supplement (doi:10.3390/nu15214515), 1991-01-01
Supplement: s1 [file s1]

**Table S2.** Sources of nutrition information and dietary advice listed in the survey questionnaire.

1

| <b>Interpersonal Sources of Information</b>         | <b>General Sources of Information</b>   |
|-----------------------------------------------------|-----------------------------------------|
| A nurse or health coach                             | Blogs or podcasts                       |
| A nutrition professional                            | Diet or health books                    |
| Celebrity doctors or experts                        | Fiction books or movies                 |
| Family members                                      | Film or TV documentaries                |
| Friends, colleagues or peers                        | Google or Internet searches             |
| Gym instructors or personal trainers                | Magazines or newspapers                 |
| Influencers I follow on social media                | Social media                            |
| My own medical doctor or GP                         | Nutrition or health websites            |
| School, college or university teachers or lecturers | Online groups or forums                 |
| Famous personalities, actors or presenters          | Scientific journals or academic manuals |
| Nutrition scientists and PhDs                       | Science news publications               |

2
