# Supplementary material for: State influence in the resettlement of Southeast Asian refugees in the state of Hawaii
Source: MDPI journal article supplement (doi:10.3390/nu15214515), 1991-01-01
Supplement: s1 [file s1]

**Table S1.** General characteristics of the study participants.

1

|                             | <b>Variables</b>                            | <b><i>n</i></b> | <b>%</b> |
|-----------------------------|---------------------------------------------|-----------------|----------|
| <b>Age</b>                  | 18-20                                       | 80              | 2.5      |
|                             | 21-25                                       | 291             | 9.2      |
|                             | 26-30                                       | 331             | 10.4     |
|                             | 31-35                                       | 403             | 12.7     |
|                             | 36-40                                       | 376             | 11.8     |
|                             | 41-45                                       | 399             | 12.5     |
|                             | 46-50                                       | 339             | 10.7     |
|                             | 51-55                                       | 359             | 11.3     |
|                             | 56-60                                       | 258             | 8.1      |
|                             | 61-65                                       | 195             | 6.1      |
|                             | 66-70                                       | 93              | 2.9      |
|                             | 70 or older                                 | 58              | 1.8      |
| <b>Gender</b>               | Male                                        | 665             | 21.0     |
|                             | Female                                      | 2477            | 78.2     |
|                             | Other                                       | 5               | 0.2      |
|                             | Prefer not to say                           | 19              | 0.6      |
| <b>Employment status</b>    | Employed, working 40 or more hours per week | 950             | 31.0     |
|                             | Employed, working 1-39 hours per week       | 1171            | 38.2     |
|                             | Not employed, looking for work              | 373             | 12.2     |
|                             | Not employed, NOT looking for work          | 259             | 8.4      |
|                             | Retired                                     | 236             | 7.7      |
|                             | Disabled, not able to work                  | 80              | 2.6      |
| <b>Country of residence</b> | United Kingdom                              | 1130            | 35.9     |
|                             | United States                               | 484             | 15.4     |
|                             | Canada                                      | 206             | 6.5      |
|                             | Australia                                   | 177             | 5.6      |
|                             | India                                       | 177             | 5.6      |
|                             | Ireland                                     | 69              | 2.2      |
|                             | Nigeria                                     | 54              | 1.7      |
|                             | South Africa                                | 54              | 1.7      |
|                             | Egypt                                       | 50              | 1.6      |

|                                         | <b>Variables</b>     | <b><i>n</i></b> | <b>%</b> |
|-----------------------------------------|----------------------|-----------------|----------|
|                                         | Pakistan             | 43              | 1.4      |
|                                         | New Zealand          | 32              | 1.0      |
|                                         | Spain                | 29              | 0.9      |
|                                         | Philippines          | 26              | 0.8      |
|                                         | Kenya                | 24              | 0.8      |
|                                         | Malaysia             | 23              | 0.7      |
|                                         | France               | 20              | 0.6      |
|                                         | Bangladesh           | 19              | 0.6      |
|                                         | United Arab Emirates | 19              | 0.6      |
|                                         | Ethiopia             | 18              | 0.6      |
|                                         | Italy                | 17              | 0.5      |
|                                         | Mexico               | 16              | 0.5      |
|                                         | Netherlands          | 14              | 0.4      |
|                                         | Russian Federation   | 14              | 0.4      |
|                                         | Germany              | 13              | 0.4      |
|                                         | Romania              | 13              | 0.4      |
|                                         | Singapore            | 13              | 0.4      |
|                                         | Ghana                | 11              | 0.4      |
|                                         | Ukraine              | 11              | 0.4      |
|                                         | Hungary              | 10              | 0.3      |
|                                         | Lebanon              | 10              | 0.3      |
|                                         | Uganda               | 10              | 0.3      |
|                                         | Cyprus               | 9               | 0.3      |
|                                         | Greece               | 9               | 0.3      |
|                                         | Indonesia            | 9               | 0.3      |
|                                         | Iran                 | 9               | 0.3      |
|                                         | Portugal             | 9               | 0.3      |
|                                         | Saudi Arabia         | 9               | 0.3      |
|                                         | Other 100 countries  | 290             | 9.2      |
| <b>Physical and digital books owned</b> | 0-9                  | 346             | 10.9     |
|                                         | 10-99                | 1204            | 37.9     |
|                                         | 100-499              | 1102            | 34.7     |
|                                         | 500-999              | 341             | 10.7     |
|                                         | 1000 or more         | 183             | 5.8      |

|                                          | Variables                                               | <i>n</i> | %    |
|------------------------------------------|---------------------------------------------------------|----------|------|
| Popular diets tried in the past          | Low-carb                                                | 1357     | 44.2 |
|                                          | Low-calorie                                             | 1282     | 41.7 |
|                                          | Low-fat                                                 | 1169     | 38.0 |
|                                          | Intermittent fasting                                    | 1144     | 37.2 |
|                                          | Vegetarian                                              | 1132     | 36.8 |
|                                          | High-protein                                            | 1084     | 35.3 |
|                                          | Plant-based                                             | 880      | 28.6 |
|                                          | Dairy-free                                              | 869      | 28.3 |
|                                          | Gluten-free                                             | 811      | 26.4 |
|                                          | Mediterranean                                           | 708      | 23.0 |
|                                          | Juicing                                                 | 651      | 21.2 |
|                                          | Vegan                                                   | 630      | 20.5 |
|                                          | Ketogenic                                               | 616      | 20.1 |
|                                          | Time-restricted eating                                  | 611      | 19.9 |
|                                          | Low-glycaemic-index                                     | 503      | 16.4 |
|                                          | Meat-based                                              | 417      | 13.6 |
|                                          | Pescatarian                                             | 303      | 9.9  |
|                                          | Low-FODMAP                                              | 196      | 6.4  |
|                                          | DASH                                                    | 110      | 3.6  |
|                                          | Other                                                   | 401      | 13.1 |
| Current dietary pattern                  | I only eat animal foods                                 | 9        | 0.3  |
|                                          | I only eat plant foods                                  | 306      | 9.8  |
|                                          | I predominantly eat plant foods, plus some animal foods | 984      | 31.5 |
|                                          | I predominantly eat animal foods, plus some plant foods | 261      | 8.4  |
|                                          | I eat a balance of plant foods and animal foods         | 1562     | 50.0 |
|                                          |                                                         |          |      |
| Self-reported health                     | Very poor                                               | 27       | 1.1  |
|                                          | Poor                                                    | 107      | 4.2  |
|                                          | Somewhat good                                           | 520      | 21.5 |
|                                          | Good                                                    | 1180     | 48.8 |
|                                          | Great                                                   | 585      | 24.2 |
| Self-reported body weight categorization | Obese                                                   | 154      | 6.3  |
|                                          | Overweight                                              | 319      | 13.0 |
|                                          | Slightly overweight                                     | 556      | 22.6 |

|                                               | <b>Variables</b>     | <b><i>n</i></b> | <b>%</b> |
|-----------------------------------------------|----------------------|-----------------|----------|
|                                               | Normal weight        | 1271            | 51.8     |
|                                               | Slightly underweight | 136             | 5.5      |
|                                               | Underweight          | 20              | 0.8      |
| <b>Self-reported physical activity levels</b> | Sedentary            | 239             | 9.7      |
|                                               | Moderately active    | 955             | 38.8     |
|                                               | Active               | 866             | 35.2     |
|                                               | Very active          | 400             | 16.3     |
| <b>Interest in nutrition and health</b>       | Extremely interested | 1535            | 62.7     |
|                                               | Very interested      | 697             | 28.5     |
|                                               | Interested           | 206             | 8.4      |
|                                               | Not very interested  | 10              | 0.4      |
|                                               | Not interested       | 2               | 0.1      |
| <b>Being a nutrition professional</b>         | Yes                  | 436             | 17.9     |
|                                               | No                   | 1438            | 58.9     |
|                                               | Studying for it      | 566             | 23.2     |
