# Supplementary material for: State influence in the resettlement of Southeast Asian refugees in the state of Hawaii
Source: MDPI journal article supplement (doi:10.3390/nu15214515), 1991-01-01
Supplement: s1 [file s1]

**Table S4.** Cross-tabulations of self-reported diet-nutrition information source-seeking frequencies with levels of trust and with reliance for making dietary changes.

|                                                                  |           | Assigned Level of Trust Relative to Source-Seeking Frequency |                       |              |                   |                   | Reliance for Making Dietary Changes Relative to Source-Seeking Frequency |       |        |            |       |              |                              |
|------------------------------------------------------------------|-----------|--------------------------------------------------------------|-----------------------|--------------|-------------------|-------------------|--------------------------------------------------------------------------|-------|--------|------------|-------|--------------|------------------------------|
| Frequency of Nutrition-Diet Information Source-Seeking Behaviors |           | Least Trust-worthy                                           | Not Very Trust-worthy | Trust-worthy | Very Trust-worthy | Most Trust-worthy | Total Re-sponses<br><i>n</i>                                             | Never | Rarely | Some-times | Often | All the Time | Total Re-sponses<br><i>n</i> |
|                                                                  |           |                                                              |                       |              |                   |                   |                                                                          |       |        |            |       |              |                              |
| Nutri-tion or health websites                                    | Never     | 24.8                                                         | 33.7                  | 35.6         | 3.0               | 3.0               | 101                                                                      | 54.8  | 20.4   | 22.6       | 1.1   | 1.1          | 93                           |
|                                                                  | Rarely    | 6.7                                                          | 36.4                  | 42.1         | 12.4              | 2.4               | 209                                                                      | 19.5  | 39.5   | 36.8       | 3.2   | 1.1          | 190                          |
|                                                                  | Sometimes | 1.6                                                          | 24.0                  | 60.8         | 11.2              | 2.5               | 893                                                                      | 6.7   | 25.5   | 58.2       | 8.0   | 1.7          | 827                          |
|                                                                  | Often     | 0.7                                                          | 8.4                   | 59.2         | 26.5              | 5.2               | 1035                                                                     | 3.4   | 10.5   | 52.5       | 30.4  | 3.3          | 978                          |
|                                                                  | Always    | 1.2                                                          | 4.7                   | 38.7         | 32.6              | 23.0              | 344                                                                      | 2.5   | 3.8    | 32.4       | 37.1  | 24.1         | 315                          |
| Google or Inter-net searches                                     | Never     | 50.6                                                         | 43.0                  | 5.1          | 0.0               | 1.3               | 156                                                                      | 84.8  | 11.3   | 3.3        | 0.0   | 0.7          | 151                          |
|                                                                  | Rarely    | 20.2                                                         | 63.1                  | 14.9         | 1.1               | 0.7               | 282                                                                      | 39.1  | 43.3   | 16.1       | 1.5   | 0.0          | 261                          |
|                                                                  | Sometimes | 6.3                                                          | 56.2                  | 35.5         | 1.6               | 0.5               | 876                                                                      | 7.0   | 18.3   | 56.4       | 16.6  | 1.8          | 833                          |
|                                                                  | Often     | 2.3                                                          | 34.4                  | 53.2         | 8.4               | 1.6               | 900                                                                      | 5.2   | 10.0   | 37.4       | 31.6  | 15.8         | 329                          |
|                                                                  | Always    | 2.0                                                          | 18.8                  | 48.2         | 20.2              | 10.9              | 357                                                                      | 17.6  | 40.9   | 37.2       | 3.4   | 0.9          | 814                          |
| Diet or health books                                             | Never     | 19.7                                                         | 44.6                  | 31.0         | 2.8               | 1.9               | 213                                                                      | 58.9  | 21.4   | 16.2       | 2.1   | 1.6          | 192                          |
|                                                                  | Rarely    | 3.7                                                          | 40.2                  | 47.6         | 7.1               | 1.4               | 351                                                                      | 22.2  | 40.6   | 32.8       | 3.4   | 1.0          | 320                          |
|                                                                  | Sometimes | 1.8                                                          | 24.4                  | 59.1         | 12.7              | 2.0               | 974                                                                      | 6.5   | 20.1   | 60.8       | 11.4  | 1.2          | 898                          |
|                                                                  | Often     | 0.3                                                          | 11.7                  | 58.1         | 24.2              | 5.7               | 776                                                                      | 1.2   | 7.7    | 48.0       | 38.6  | 4.5          | 741                          |
|                                                                  | Always    | 2.3                                                          | 3.8                   | 34.5         | 30.7              | 28.8              | 267                                                                      | 2.5   | 2.9    | 30.7       | 37.3  | 26.6         | 241                          |
| Scien-tific journals or aca-demic manuals                        | Never     | 9.9                                                          | 13.7                  | 45.6         | 18.6              | 12.3              | 496                                                                      | 55.5  | 22.9   | 17.7       | 3.0   | 0.9          | 436                          |
|                                                                  | Rarely    | 3.5                                                          | 10.5                  | 45.4         | 27.9              | 12.7              | 456                                                                      | 19.1  | 33.8   | 35.7       | 10.2  | 1.2          | 420                          |
|                                                                  | Sometimes | 0.8                                                          | 5.4                   | 46.6         | 32.4              | 15.0              | 782                                                                      | 8.5   | 18.2   | 52.5       | 17.8  | 3.0          | 730                          |
|                                                                  | Often     | 0.9                                                          | 2.3                   | 31.1         | 37.4              | 28.4              | 578                                                                      | 2.6   | 6.6    | 44.8       | 37.8  | 8.2          | 547                          |
|                                                                  | Always    | 1.2                                                          | 2.3                   | 18.8         | 24.9              | 52.9              | 261                                                                      | 2.5   | 3.3    | 31.2       | 30.7  | 32.4         | 244                          |
| Science news publica-tions                                       | Never     | 11.7                                                         | 21.5                  | 45.7         | 15.0              | 6.1               | 446                                                                      | 56.0  | 22.3   | 18.3       | 2.3   | 1.3          | 400                          |
|                                                                  | Rarely    | 5.7                                                          | 14.4                  | 55.2         | 20.1              | 4.6               | 458                                                                      | 22.8  | 36.0   | 34.8       | 6.1   | 0.2          | 425                          |
|                                                                  | Sometimes | 1.6                                                          | 8.8                   | 53.6         | 27.3              | 8.8               | 901                                                                      | 12.1  | 20.2   | 51.0       | 14.4  | 2.2          | 825                          |
|                                                                  | Often     | 1.1                                                          | 2.7                   | 38.2         | 40.5              | 17.6              | 558                                                                      | 2.5   | 9.3    | 51.9       | 30.1  | 6.3          | 528                          |
|                                                                  | Always    | 1.4                                                          | 5.2                   | 21.8         | 28.4              | 43.1              | 211                                                                      | 4.5   | 7.5    | 29.2       | 30.7  | 28.1         | 199                          |
|                                                                  | Never     | 4.8                                                          | 7.7                   | 39.1         | 25.4              | 23.0              | 673                                                                      | 35.8  | 18.3   | 32.5       | 8.9   | 4.5          | 606                          |

|                                      |           |      |      |      |      |      |     |      |      |      |      |      |     |
|--------------------------------------|-----------|------|------|------|------|------|-----|------|------|------|------|------|-----|
| <b>Nutrition scientists and PhDs</b> | Rarely    | 1.3  | 7.3  | 39.8 | 30.1 | 21.5 | 382 | 11.9 | 20.1 | 45.6 | 17.9 | 4.5  | 353 |
|                                      | Sometimes | 0.6  | 4.0  | 38.9 | 34.0 | 22.6 | 705 | 6.3  | 10.1 | 54.4 | 23.7 | 5.5  | 651 |
|                                      | Often     | 0.4  | 0.5  | 22.5 | 39.6 | 37.0 | 573 | 1.7  | 4.8  | 36.3 | 43.8 | 13.6 | 546 |
|                                      | Always    | 0.7  | 1.1  | 12.2 | 20.7 | 65.2 | 270 | 2.1  | 1.2  | 16.5 | 44.0 | 36.2 | 243 |
| <b>A nutrition professional</b>      | Never     | 3.8  | 10.5 | 43.2 | 26.0 | 16.5 | 101 | 36.2 | 17.8 | 32.7 | 9.5  | 3.8  | 550 |
|                                      | Rarely    | 1.6  | 7.6  | 42.9 | 31.6 | 16.4 | 74  | 11.8 | 18.0 | 49.4 | 16.3 | 4.6  | 417 |
|                                      | Sometimes | 0.7  | 3.9  | 41.7 | 33.9 | 19.8 | 151 | 5.8  | 8.6  | 50.5 | 28.9 | 6.2  | 707 |
|                                      | Often     | 0.4  | 2.0  | 28.8 | 44.0 | 24.9 | 126 | 1.5  | 2.9  | 33.9 | 47.1 | 14.7 | 484 |
|                                      | Always    | 1.1  | 2.6  | 17.1 | 30.1 | 49.1 | 132 | 1.6  | 0.8  | 14.2 | 41.3 | 42.1 | 247 |
| <b>Social media</b>                  | Never     | 75.3 | 23.6 | 0.9  | 0.1  | 0.1  | 780 | 90.3 | 7.7  | 1.6  | 0.1  | 0.3  | 730 |
|                                      | Rarely    | 39.0 | 55.1 | 5.7  | 0.2  | 0.0  | 613 | 57.9 | 33.9 | 7.2  | 0.9  | 0.2  | 570 |
|                                      | Sometimes | 17.3 | 61.5 | 19.8 | 1.2  | 0.3  | 753 | 26.9 | 39.2 | 30.0 | 3.1  | 0.9  | 689 |
|                                      | Often     | 11.0 | 49.7 | 33.1 | 5.5  | 0.6  | 326 | 13.0 | 27.7 | 44.0 | 14.0 | 1.3  | 307 |
|                                      | Always    | 5.8  | 25.6 | 34.9 | 22.1 | 11.6 | 86  | 10.1 | 8.9  | 36.7 | 25.3 | 19.0 | 79  |
| <b>Film or TV documentaries</b>      | Never     | 49.5 | 35.1 | 14.5 | 0.9  | 0.0  | 683 | 79.2 | 13.7 | 6.5  | 0.3  | 0.3  | 629 |
|                                      | Rarely    | 16.4 | 51.2 | 30.5 | 1.6  | 0.3  | 691 | 44.9 | 40.5 | 13.2 | 1.1  | 0.3  | 637 |
|                                      | Sometimes | 7.1  | 32.9 | 54.1 | 5.5  | 0.4  | 856 | 20.8 | 32.3 | 40.4 | 6.1  | 0.5  | 803 |
|                                      | Often     | 3.2  | 14.2 | 59.9 | 19.2 | 3.6  | 282 | 8.9  | 16.7 | 47.0 | 25.2 | 2.2  | 270 |
|                                      | Always    | 2.1  | 21.3 | 38.3 | 21.3 | 17.0 | 47  | 9.1  | 6.8  | 31.8 | 27.3 | 25.0 | 44  |
| <b>Blogs or podcasts</b>             | Never     | 46.6 | 43.4 | 9.3  | 0.5  | 0.3  | 788 | 88.4 | 9.2  | 1.8  | 0.3  | 0.3  | 717 |
|                                      | Rarely    | 12.8 | 58.3 | 27.0 | 1.6  | 0.4  | 571 | 48.2 | 37.5 | 12.0 | 2.0  | 0.4  | 544 |
|                                      | Sometimes | 4.1  | 43.1 | 48.3 | 4.1  | 0.4  | 758 | 18.9 | 36.0 | 40.4 | 3.7  | 1.0  | 705 |
|                                      | Often     | 1.5  | 22.9 | 59.0 | 15.4 | 1.2  | 332 | 5.1  | 19.0 | 51.0 | 23.4 | 1.6  | 316 |
|                                      | Always    | 4.9  | 17.3 | 43.2 | 24.7 | 9.9  | 81  | 8.0  | 18.7 | 26.7 | 34.7 | 12.0 | 75  |
| <b>Friends, colleagues or peers</b>  | Never     | 44.4 | 44.7 | 10.4 | 0.3  | 0.1  | 709 | 73.6 | 19.2 | 6.4  | 0.5  | 0.3  | 660 |
|                                      | Rarely    | 21.7 | 57.3 | 19.5 | 1.6  | 0.0  | 683 | 37.0 | 44.0 | 18.2 | 0.6  | 0.2  | 638 |
|                                      | Sometimes | 9.9  | 46.5 | 40.4 | 2.6  | 0.6  | 858 | 19.4 | 35.8 | 40.7 | 3.0  | 1.0  | 798 |
|                                      | Often     | 6.7  | 27.9 | 49.1 | 13.4 | 3.0  | 269 | 10.3 | 23.3 | 44.7 | 18.2 | 3.6  | 253 |
|                                      | Always    | 9.3  | 20.4 | 50.0 | 14.8 | 5.6  | 54  | 12.2 | 18.4 | 34.7 | 16.3 | 18.4 | 49  |
| <b>Online groups or forums</b>       | Never     | 46.1 | 46.3 | 6.9  | 0.5  | 0.1  | 807 | 83.6 | 12.7 | 2.8  | 0.9  | 0.0  | 743 |
|                                      | Rarely    | 16.4 | 61.2 | 19.5 | 2.6  | 0.3  | 610 | 49.8 | 37.9 | 10.9 | 1.4  | 0.0  | 570 |
|                                      | Sometimes | 7.2  | 52.1 | 37.4 | 2.9  | 0.4  | 725 | 23.1 | 37.2 | 36.7 | 2.4  | 0.6  | 675 |
|                                      | Often     | 3.7  | 33.5 | 52.4 | 8.8  | 1.5  | 328 | 10.8 | 23.1 | 51.0 | 13.6 | 1.6  | 316 |
|                                      | Always    | 5.4  | 17.6 | 44.6 | 21.6 | 10.8 | 74  | 16.2 | 11.8 | 26.5 | 25.0 | 20.6 | 68  |
|                                      | Never     | 55.1 | 36.1 | 7.8  | 0.8  | 0.3  | 771 | 81.6 | 14.5 | 3.5  | 0.3  | 0.1  | 718 |

|                                                            |           |      |      |      |      |      |      |      |      |      |      |      |      |
|------------------------------------------------------------|-----------|------|------|------|------|------|------|------|------|------|------|------|------|
| <b>Magazines or newspapers</b>                             | Rarely    | 19.1 | 63.3 | 15.9 | 1.7  | 0.1  | 713  | 42.6 | 42.9 | 13.2 | 1.1  | 0.2  | 650  |
|                                                            | Sometimes | 8.3  | 49.0 | 39.1 | 2.9  | 0.7  | 806  | 18.8 | 37.7 | 38.5 | 4.5  | 0.5  | 751  |
|                                                            | Often     | 3.6  | 28.5 | 57.5 | 9.5  | 0.9  | 221  | 8.1  | 21.0 | 50.5 | 18.6 | 1.9  | 210  |
|                                                            | Always    | 10.7 | 10.7 | 33.9 | 23.1 | 21.4 | 56   | 16.3 | 8.1  | 30.6 | 16.3 | 28.6 | 49   |
| <b>Influencers I follow on social media</b>                | Never     | 69.0 | 25.9 | 4.2  | 0.9  | 0.0  | 1016 | 85.6 | 10.3 | 3.5  | 0.4  | 0.1  | 939  |
|                                                            | Rarely    | 27.2 | 55.0 | 16.8 | 0.8  | 0.2  | 493  | 50.8 | 31.3 | 14.8 | 2.6  | 0.6  | 467  |
|                                                            | Sometimes | 15.6 | 50.6 | 30.1 | 2.6  | 1.1  | 654  | 30.0 | 32.6 | 32.1 | 3.8  | 1.5  | 610  |
|                                                            | Often     | 6.3  | 38.3 | 42.1 | 10.1 | 3.2  | 316  | 13.4 | 22.3 | 42.8 | 18.8 | 2.7  | 292  |
|                                                            | Always    | 9.6  | 18.1 | 41.5 | 17.0 | 13.8 | 94   | 13.8 | 13.8 | 37.9 | 21.8 | 12.6 | 87   |
| <b>Family members</b>                                      | Never     | 48.0 | 41.1 | 9.7  | 1.0  | 0.3  | 984  | 72.0 | 20.2 | 6.6  | 0.7  | 0.5  | 925  |
|                                                            | Rarely    | 13.6 | 58.1 | 26.0 | 2.0  | 0.4  | 716  | 27.9 | 47.3 | 22.1 | 2.2  | 0.5  | 673  |
|                                                            | Sometimes | 3.5  | 36.9 | 52.2 | 5.3  | 2.2  | 604  | 7.4  | 26.9 | 58.7 | 5.9  | 1.1  | 557  |
|                                                            | Often     | 4.5  | 16.6 | 52.3 | 22.1 | 4.5  | 199  | 3.4  | 15.6 | 43.6 | 31.8 | 5.6  | 179  |
|                                                            | Always    | 4.4  | 13.0 | 44.9 | 18.8 | 18.8 | 69   | 6.8  | 3.4  | 33.9 | 28.8 | 27.1 | 59   |
| <b>A nurse or health coach</b>                             | Never     | 11.7 | 30.7 | 47.3 | 7.6  | 2.6  | 1143 | 55.7 | 21.6 | 19.3 | 2.5  | 0.9  | 1061 |
|                                                            | Rarely    | 3.4  | 22.3 | 58.1 | 14.3 | 1.9  | 530  | 25.1 | 30.7 | 34.8 | 8.5  | 1.0  | 495  |
|                                                            | Sometimes | 1.2  | 12.6 | 62.1 | 20.3 | 3.9  | 597  | 10.0 | 17.9 | 53.1 | 17.0 | 2.0  | 548  |
|                                                            | Often     | 1.3  | 5.3  | 47.8 | 38.5 | 7.1  | 226  | 10.1 | 9.7  | 36.2 | 35.3 | 8.7  | 207  |
|                                                            | Always    | 2.5  | 6.2  | 32.1 | 23.5 | 35.8 | 81   | 4.0  | 5.3  | 26.3 | 35.5 | 29.0 | 76   |
| <b>My own medical doctor or GP</b>                         | Never     | 22.8 | 35.2 | 32.5 | 7.4  | 2.1  | 1156 | 62.7 | 20.4 | 12.9 | 3.2  | 0.9  | 1071 |
|                                                            | Rarely    | 5.6  | 32.7 | 49.5 | 9.4  | 2.8  | 640  | 18.9 | 38.6 | 35.1 | 6.2  | 1.2  | 593  |
|                                                            | Sometimes | 1.9  | 15.9 | 56.1 | 19.9 | 6.2  | 529  | 7.1  | 15.8 | 51.9 | 18.7 | 6.5  | 493  |
|                                                            | Often     | 2.1  | 2.6  | 42.4 | 36.1 | 16.8 | 191  | 4.5  | 5.6  | 30.2 | 46.4 | 13.4 | 179  |
|                                                            | Always    | 1.3  | 4.0  | 24.0 | 26.7 | 44.0 | 75   | 4.5  | 3.0  | 19.4 | 31.3 | 41.8 | 67   |
| <b>Celebrity doctors or experts</b>                        | Never     | 40.0 | 36.8 | 19.8 | 2.7  | 0.7  | 1211 | 77.0 | 14.2 | 7.2  | 1.0  | 0.7  | 1124 |
|                                                            | Rarely    | 16.7 | 52.7 | 26.1 | 3.8  | 0.8  | 528  | 44.7 | 35.8 | 15.6 | 3.0  | 0.8  | 494  |
|                                                            | Sometimes | 7.5  | 31.0 | 51.0 | 8.9  | 1.6  | 561  | 24.7 | 28.9 | 38.7 | 6.7  | 1.0  | 522  |
|                                                            | Often     | 6.3  | 20.2 | 48.6 | 22.1 | 2.9  | 208  | 18.1 | 19.7 | 37.8 | 19.7 | 4.7  | 193  |
|                                                            | Always    | 10.3 | 13.2 | 33.8 | 19.1 | 23.5 | 68   | 8.5  | 22.0 | 27.1 | 22.0 | 20.3 | 59   |
| <b>School, college or university teachers or lecturers</b> | Never     | 19.2 | 38.4 | 34.8 | 6.1  | 1.6  | 1321 | 68.7 | 19.6 | 9.7  | 1.2  | 0.7  | 1223 |
|                                                            | Rarely    | 5.3  | 29.0 | 55.0 | 8.7  | 2.0  | 458  | 33.6 | 37.1 | 24.7 | 4.4  | 0.2  | 434  |
|                                                            | Sometimes | 3.3  | 17.6 | 60.6 | 15.3 | 3.3  | 490  | 19.6 | 26.0 | 41.8 | 11.6 | 1.1  | 450  |
|                                                            | Often     | 2.7  | 4.1  | 44.8 | 39.3 | 9.1  | 219  | 10.7 | 17.6 | 41.5 | 24.4 | 5.9  | 205  |
|                                                            | Always    | 1.2  | 8.1  | 34.9 | 25.6 | 30.2 | 86   | 13.8 | 15.0 | 27.5 | 30.0 | 13.8 | 80   |
|                                                            | Never     | 22.5 | 47.8 | 26.4 | 2.8  | 0.6  | 1271 | 71.8 | 18.4 | 8.5  | 1.0  | 0.3  | 1171 |

|                                                   |           |             |             |             |             |             |      |             |             |             |             |             |      |
|---------------------------------------------------|-----------|-------------|-------------|-------------|-------------|-------------|------|-------------|-------------|-------------|-------------|-------------|------|
| <b>Gym instructors or personal trainers</b>       | Rarely    | <b>4.4</b>  | <b>45.7</b> | <b>44.2</b> | <b>4.8</b>  | <b>0.9</b>  | 547  | <b>28.4</b> | <b>42.6</b> | <b>25.3</b> | <b>2.9</b>  | <b>0.8</b>  | 514  |
|                                                   | Sometimes | <b>1.9</b>  | <b>23.5</b> | <b>61.7</b> | <b>9.6</b>  | <b>3.3</b>  | 519  | <b>8.2</b>  | <b>22.5</b> | <b>53.9</b> | <b>12.9</b> | <b>2.5</b>  | 488  |
|                                                   | Often     | <b>2.1</b>  | <b>13.7</b> | <b>49.0</b> | <b>31.1</b> | <b>4.2</b>  | 190  | <b>3.4</b>  | <b>9.7</b>  | <b>43.4</b> | <b>33.1</b> | <b>10.3</b> | 175  |
|                                                   | Always    | <b>1.6</b>  | <b>12.5</b> | <b>32.8</b> | <b>32.8</b> | <b>20.3</b> | 64   | <b>0.0</b>  | <b>3.8</b>  | <b>22.6</b> | <b>41.5</b> | <b>32.1</b> | 53   |
| <b>Famous personalities, actors or presenters</b> | Never     | <b>67.6</b> | <b>29.1</b> | <b>3.0</b>  | <b>0.3</b>  | <b>0.1</b>  | 1789 | <b>84.5</b> | <b>11.1</b> | <b>3.5</b>  | <b>0.7</b>  | <b>0.2</b>  | 1665 |
|                                                   | Rarely    | <b>33.9</b> | <b>54.9</b> | <b>9.4</b>  | <b>1.1</b>  | <b>0.7</b>  | 446  | <b>47.0</b> | <b>38.2</b> | <b>12.9</b> | <b>1.2</b>  | <b>0.7</b>  | 419  |
|                                                   | Sometimes | <b>17.0</b> | <b>53.0</b> | <b>26.7</b> | <b>3.2</b>  | <b>0.0</b>  | 247  | <b>27.2</b> | <b>37.1</b> | <b>29.9</b> | <b>4.5</b>  | <b>1.3</b>  | 224  |
|                                                   | Often     | <b>12.7</b> | <b>42.3</b> | <b>26.8</b> | <b>15.5</b> | <b>2.8</b>  | 71   | <b>29.0</b> | <b>17.7</b> | <b>35.5</b> | <b>12.9</b> | <b>4.8</b>  | 62   |
|                                                   | Always    | <b>23.5</b> | <b>17.7</b> | <b>32.4</b> | <b>14.7</b> | <b>11.8</b> | 34   | <b>25.9</b> | <b>14.8</b> | <b>14.8</b> | <b>22.2</b> | <b>22.2</b> | 27   |
| <b>Fiction books or movies</b>                    | Never     | <b>80.2</b> | <b>17.2</b> | <b>2.3</b>  | <b>0.2</b>  | <b>0.1</b>  | 1972 | <b>92.3</b> | <b>5.5</b>  | <b>1.9</b>  | <b>0.2</b>  | <b>0.1</b>  | 1843 |
|                                                   | Rarely    | <b>34.6</b> | <b>50.0</b> | <b>13.9</b> | <b>0.9</b>  | <b>0.6</b>  | 330  | <b>51.1</b> | <b>36.8</b> | <b>9.8</b>  | <b>1.6</b>  | <b>0.7</b>  | 307  |
|                                                   | Sometimes | <b>16.5</b> | <b>41.5</b> | <b>35.2</b> | <b>5.7</b>  | <b>1.1</b>  | 176  | <b>32.3</b> | <b>30.3</b> | <b>25.8</b> | <b>8.4</b>  | <b>3.2</b>  | 155  |
|                                                   | Often     | <b>10.2</b> | <b>46.9</b> | <b>34.7</b> | <b>4.1</b>  | <b>4.1</b>  | 49   | <b>31.8</b> | <b>20.5</b> | <b>31.8</b> | <b>15.9</b> | <b>0.0</b>  | 44   |
|                                                   | Always    | <b>7.1</b>  | <b>14.3</b> | <b>32.1</b> | <b>28.6</b> | <b>17.9</b> | 28   | <b>22.2</b> | <b>11.1</b> | <b>33.3</b> | <b>3.7</b>  | <b>29.6</b> | 27   |

\* Bolded values represent  $p < 0.05$ .
